# Supplementary material
Source: Springer Nature journal article supplement (https://www.springermedizin.de/resource/supplementary/13075_2009_2735_MOESM2_ESM.pdf/9692770)

**(a)****2 mg**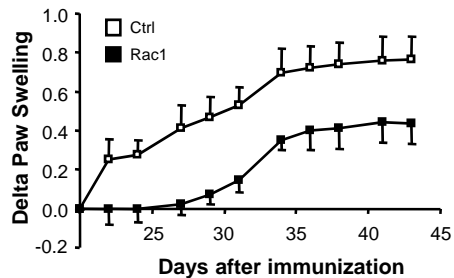**1 mg**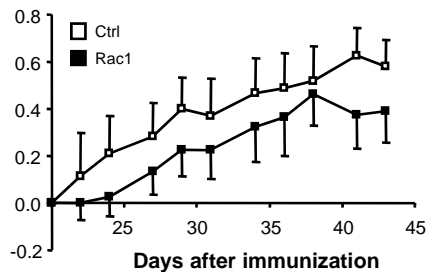**0.5 mg**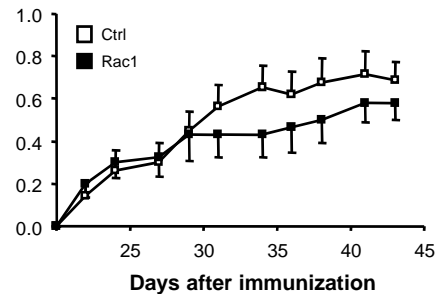**(b)**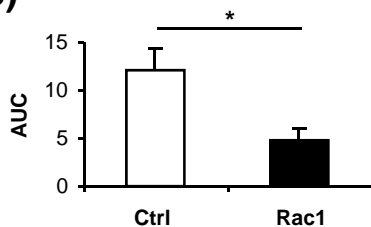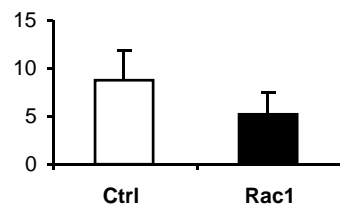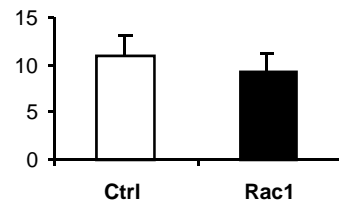**(c)**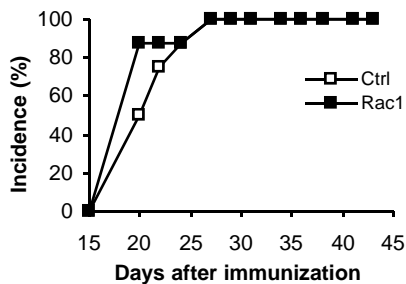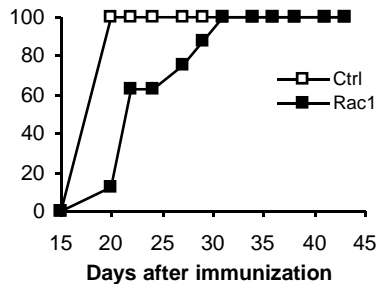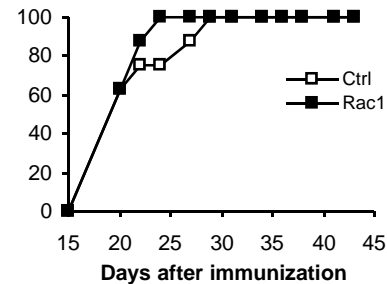

Supplement: MOESM2 [file 9692770]
